# Supplementary material
Source: publisher figshare collection journal article supplement (https://tandf.figshare.com/ndownloader/files/16837880)
Supplement: Supplementary file 1 [file 16837880]

**Foraging behaviour of songbirds in woodlands and forests in eastern Australia: resource partitioning and guild structure**

**Eva Remešová, Beata Matysioková, Lucia Turčoková Rubáčová, and Vladimír Remeš**

**Supplementary Material**

**Figure S1:** Map of eastern Australia with our 21 study sites.

**Figure S2:** An example of the placement of three study transects at Chiltern-Mt. Pilot NP site.

**Figure S3:** Proportion of the prey attacks in different distances from plant stem.

**Figure S4:** Proportion of the prey attacks in different foliage density.

**Figure S5:** The relationship between foraging bird height and vegetation height.

**Figure S6:** Co-occurrence of 41 species across the 21 sites (based on presence-absence)

**Figure S7:** Co-occurrence of 41 species across the 21 sites (based on the number of individuals observed)

**Table S1:** Overview of our 21 study sites.

**Table S2:** The number of prey attacks for the method used in best sampled 41 species.

**Table S3:** The number of prey attacks for the substrate used in best sampled 41 species.

**Table S4:** Overview of samples obtained at each site.

**Table S5:** The distribution of prey attacks among different categories of methods and substrates in this study and three studies from eucalypt woodlands in Australia.

**Table S6:** The number of prey attacks and individuals recorded, mean foraging height, beak length, body mass, and Levins’ specialization index for foraging method and substrate in best sampled 41 species.

**Figure S1** Map of eastern Australia with our 21 study sites. Size of the circle is proportional to the number of prey attacks while colour refers to the mean canopy height at the site. The number in brackets encodes the site name as follows: (1) White Mountains NP, (2) Blackwood NP/ Nairana NP, (3) Dergholm SP, (4) Undara Volcanic NP, (5) Conimbla NP, (6) Killarney NP/ Bobbiwaa SCA, (7) Paluma Range NP, (8) Blair Athol SF, (9) Bendigo SF, (10) Chiltern-Mt. Pilot NP, (11) Pilliga East NP, (12) Herberton Range NP, (13) Grampians NP, (14) Cobboboonee NP, (15) Columbey NP/ Wallaroo NP, (16) Mt. Binga NP, (17) Conjola NP, (18) Croajingolong NP, (19) Coominglah SF, (20) Gympie NP, (21) Bellthorpe NP. Sites are numbered with increasing canopy height as in Figure 1 in the main text.


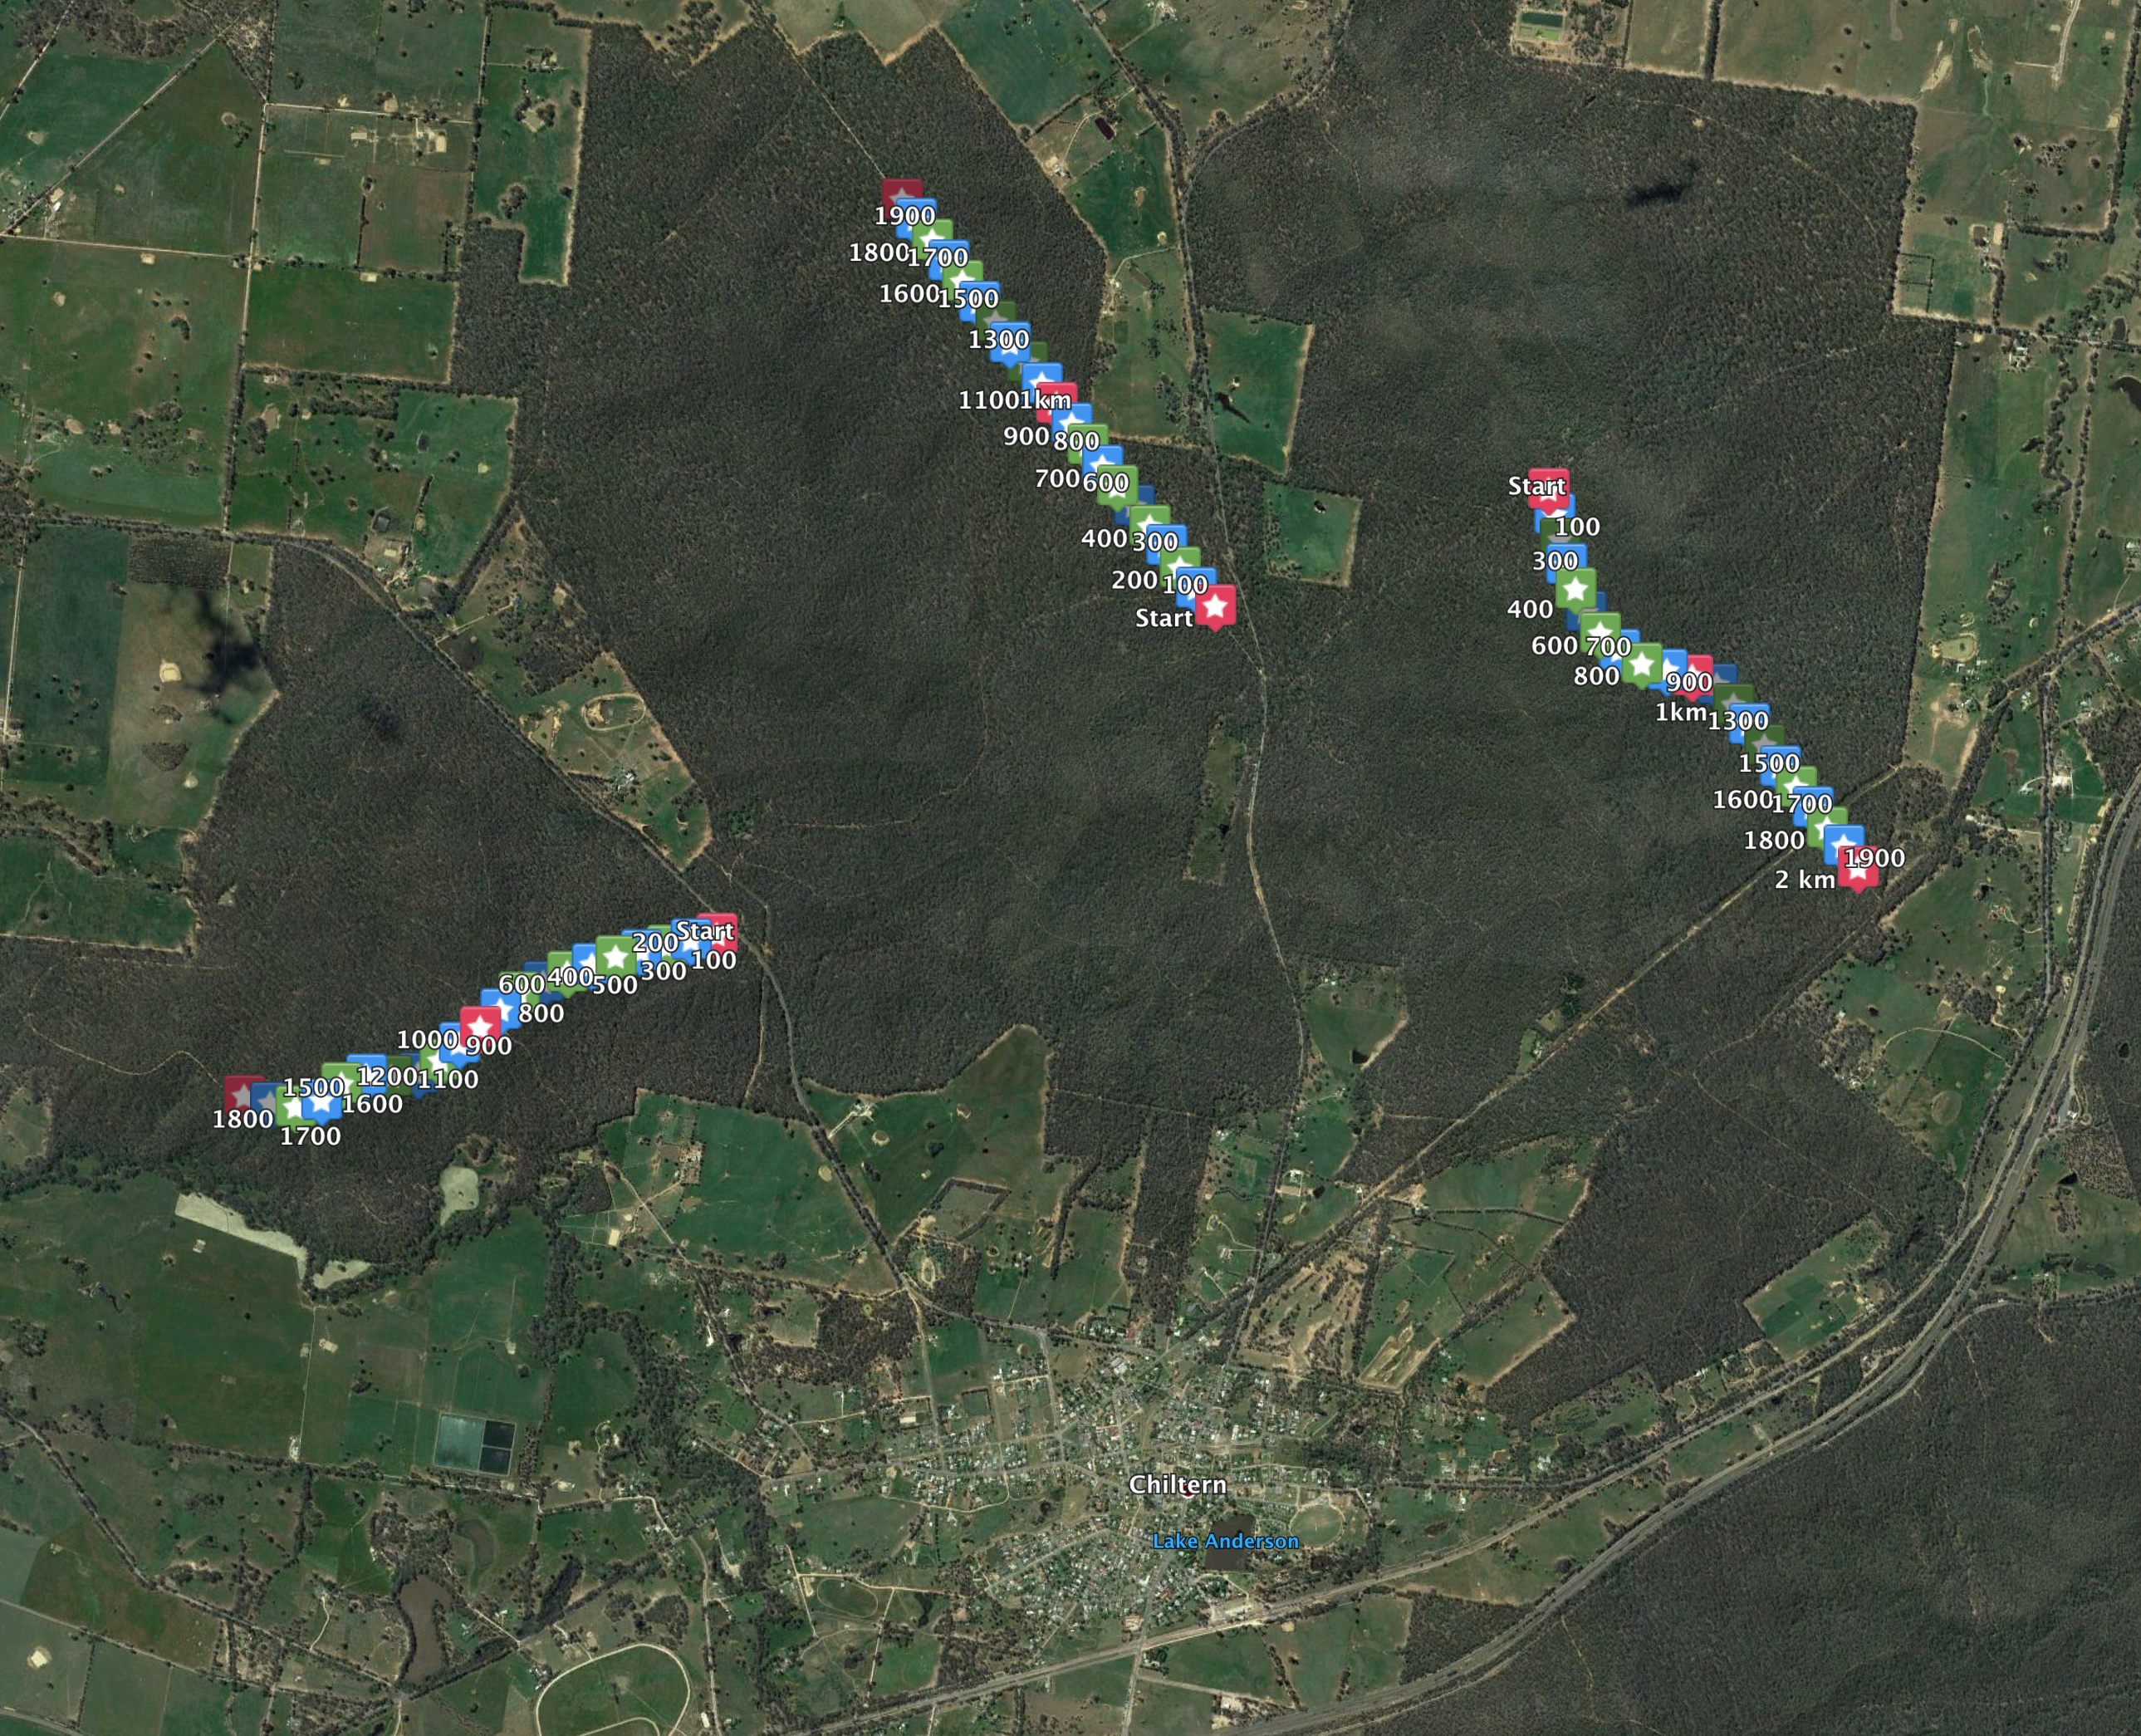


**Figure S2** An example of transect placement at Chiltern-Mt. Pilot NP. Georeferenced points placed every 100 m are marked by colour symbols. They were used to keep the tempo of walking along the transect roughly constant, and also to precisely locate vegetation sampling points (every second point, i.e. every 200 m).


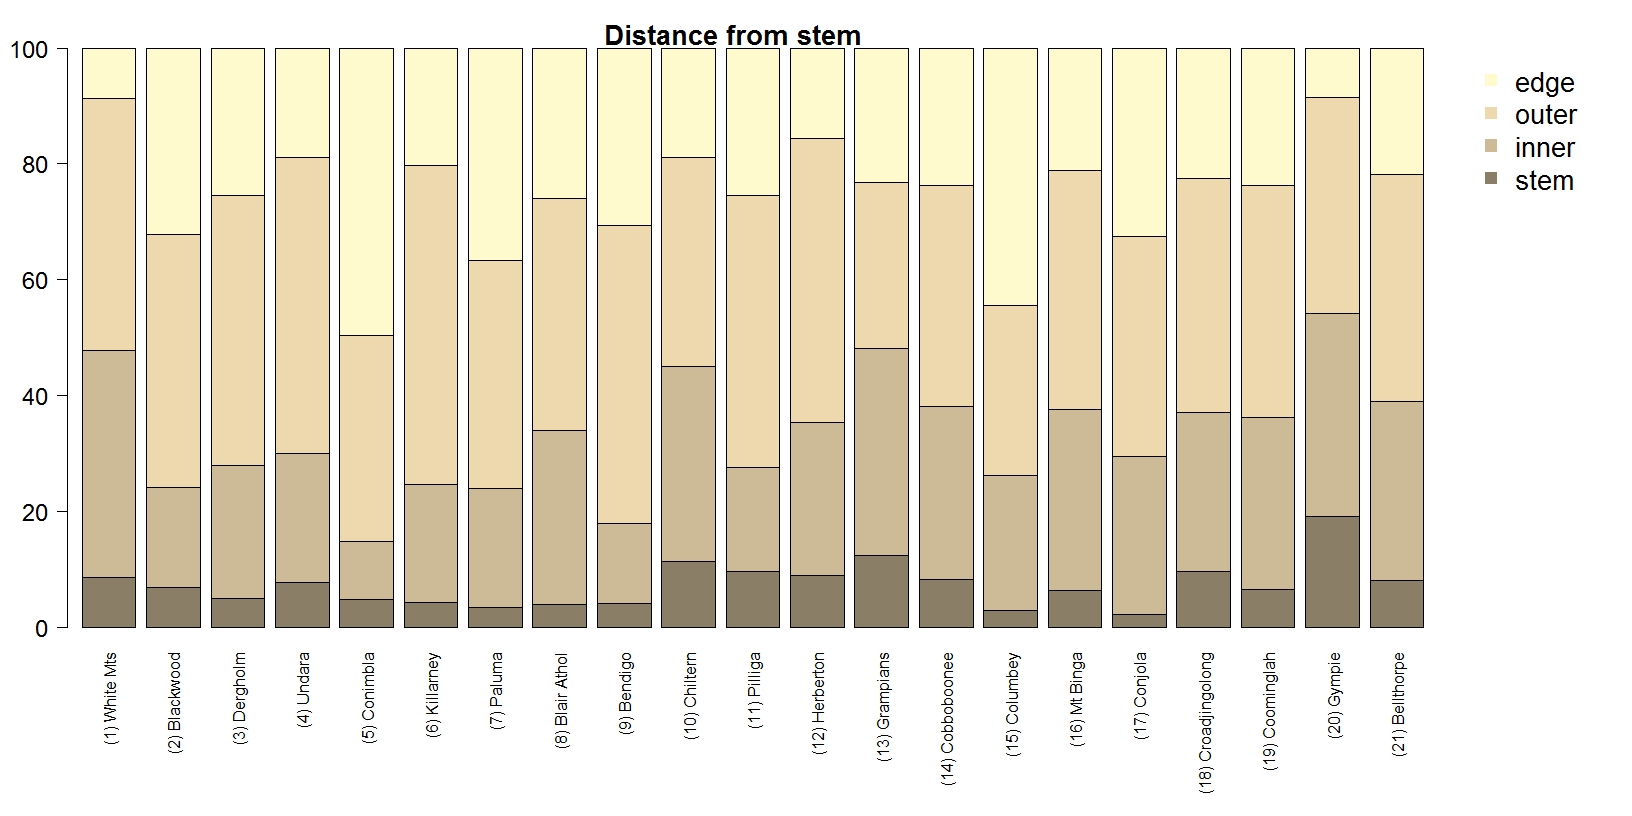


**Figure S3** Proportions of the prey attacks made in different distances from the stem of the shrub or tree the bird foraged on at our 21 study sites.

**
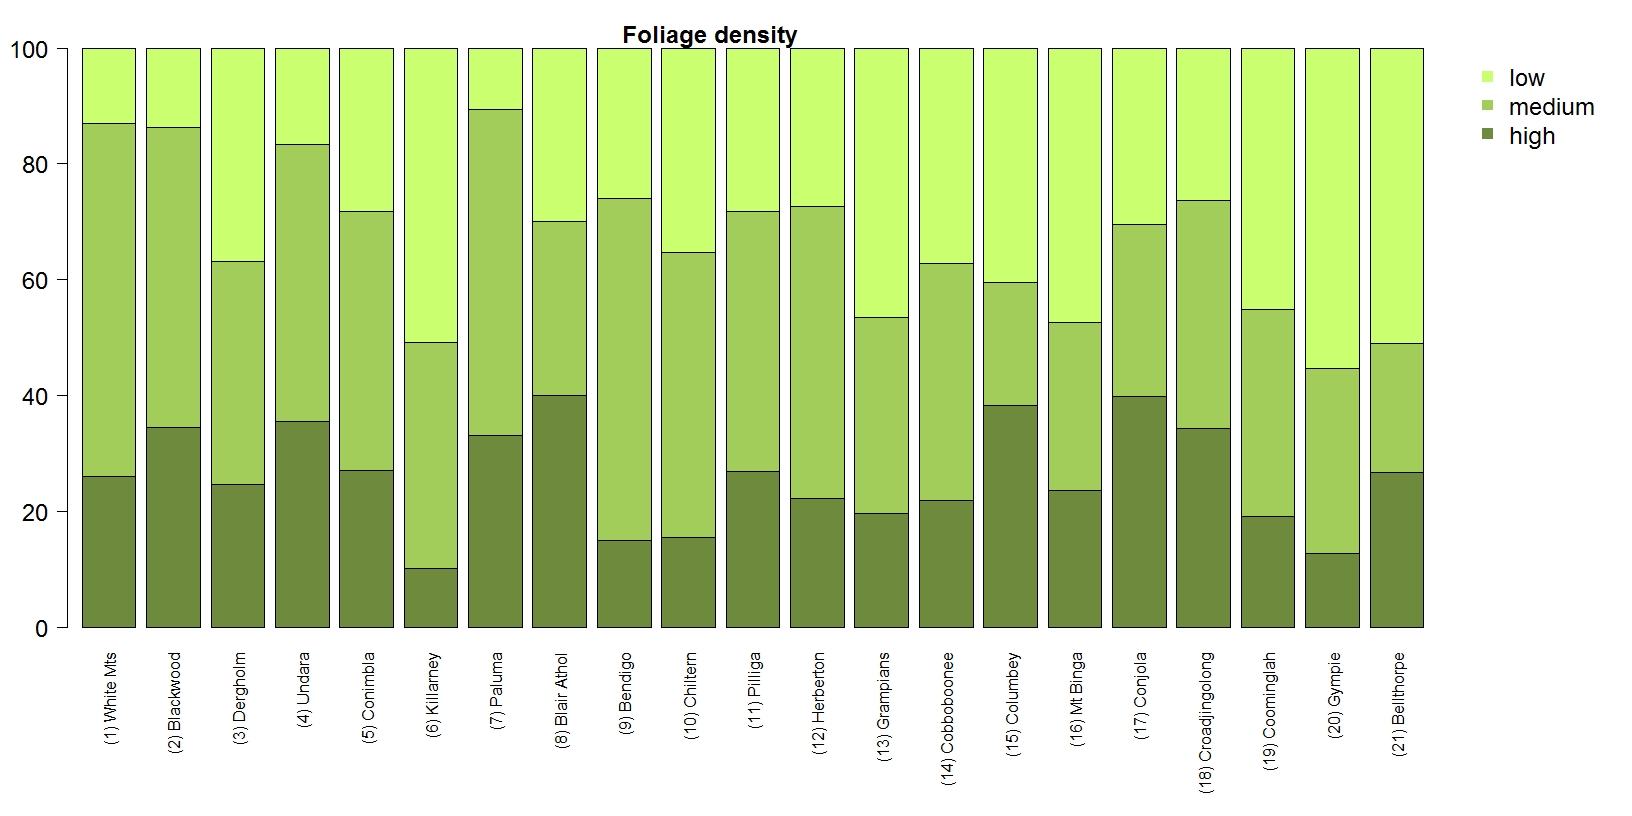
**

**Figure S4** Proportions of the prey attacks made in different foliage density across our 21 sites.

**Figure S5** The relationship between foraging bird height and vegetation height (n = 2356 prey attacks). Canopy height is the mean height of trees at each site (left, see Methods). Plant height refers to the height of the particular plant the particular bird foraged on (right). In the left panel, points were horizontally slightly jittered to reduce their overlap. Foraging substrate “air” was not included in either panel.

**Figure S6** Co-occurrence of the 41 best sampled species across the 21 sites (based on presence-absence of species recorded at study sites during all six transect monitoring sessions). Red colour means presence, while yellow means absence of a given species at a given site. Similar sites (in terms of species composition) and species (in terms of site presence) are clustered together (see dendrograms along the left and top edge of the figure).

**Figure S7** Co-occurrence of the 41 best sampled species across the 21 sites (based on the number of individuals recorded at study sites together during all six transect monitoring sessions). Magenta colour means high number of individuals (maximum = 146), blue means absence of a given species at a given site, while whit(ish) means intermediate situation (loge scale). Similar sites (in terms of species composition) and species (in terms of site occupation) are clustered together (see dendrograms along the left and top edge of the figure).

**Table S1** Overview of the sites, year and month(s) of visit, state, geographic longitude and latitude, and observers (ER: E. Remešová, VR: V. Remeš, BM: B. Matysioková, LT: L. Turčoková Rubáčová). Sites are ordered by canopy height (from lowest to highest) as in Figure S1 and in Table S4.

| **Site** | **Year** | **Months** | **State** | **Latitude** | **Longitude** | **Observers** |
| --- | --- | --- | --- | --- | --- | --- |
| White Mountains NP | 2016 | IX - X | QLD | -20.714 | 145.177 | ER, VR |
| Blackwood NP/ Nairana NP | 2016 | X | QLD | -21.465 | 146.683 | ER, VR |
| Dergholm SP | 2016 | XI | VIC | -37.254 | 141.140 | BM, LT |
| Undara Volcanic NP | 2016 | IX | QLD | -18.208 | 144.572 | ER, VR |
| Conimbla NP | 2017 | X | NSW | -33.894 | 148.391 | ER, VR |
| Killarney NP/ Bobbiwaa SCA | 2017 | IX | NSW | -30.240 | 149.884 | ER, VR |
| Paluma Range NP | 2016 | X | QLD | -18.982 | 146.244 | ER, VR |
| Blair Athol SF | 2017 | XII | QLD | -22.697 | 147.474 | BM, LT |
| Bendigo SF | 2016 | XI | VIC | -36.704 | 144.352 | BM, LT |
| Chiltern-Mt. Pilot NP | 2016 | X | VIC | -36.137 | 146.577 | BM, LT |
| Pilliga East NP | 2017 | IX - X | NSW | -30.546 | 149.595 | ER, VR |
| Herberton Range NP | 2016 | X - XI | QLD | -17.333 | 145.415 | ER, VR |
| Grampians NP | 2016 | XI | VIC | -37.225 | 142.554 | BM, LT |
| Cobboboonee NP | 2016 | XI | VIC | -38.151 | 141.514 | BM, LT |
| Columbey NP/ Wallaroo NP | 2017 | X | NSW | -32.581 | 151.741 | ER, VR |
| Mt. Binga NP | 2017 | XI | QLD | -27.001 | 151.915 | BM, LT |
| Conjola NP | 2017 | X - XI | NSW | -35.165 | 150.429 | ER, VR |
| Croajingolong NP | 2016 | XII | VIC | -37.518 | 149.697 | BM, LT |
| Coominglah SF | 2017 | XI | QLD | -24.897 | 151.040 | BM, LT |
| Gympie NP | 2017 | X | QLD | -26.054 | 152.704 | BM, LT |
| Bellthorpe NP | 2017 | XI | QLD | -26.877 | 152.696 | BM, LT |

**Table S2** The number of prey attacks in each category of the **foraging method** recorded for the 41 species with the minimum of 30 prey attacks.

|  |  | **flycatching** | **gleaning** | **hang-gleaning** | **hover-snatching** | **manipulation** | **pouncing** | **probing** | **snatching** |
| --- | --- | --- | --- | --- | --- | --- | --- | --- | --- |
| **GLEANING** | |  |  |  |  |  |  |  |  |
|  | *Acanthiza_nana* | 0 | 109 | 24 | 24 | 0 | 1 | 0 | 78 |
|  | *Acanthiza_pusilla* | 3 | 289 | 78 | 66 | 1 | 0 | 8 | 112 |
|  | *Acanthiza_reguloides* | 0 | 53 | 9 | 17 | 2 | 0 | 0 | 17 |
|  | *Colluricincla_harmonica* | 0 | 20 | 1 | 0 | 5 | 1 | 0 | 14 |
|  | *Cormobates_leucophaea* | 0 | 174 | 0 | 0 | 12 | 0 | 82 | 1 |
|  | *Cracticus_tibicen* | 0 | 16 | 0 | 0 | 0 | 1 | 16 | 0 |
|  | *Daphoenositta_chrysoptera* | 0 | 137 | 1 | 1 | 14 | 0 | 4 | 0 |
|  | *Dicaeum_hirundinaceum* | 0 | 23 | 5 | 3 | 0 | 0 | 3 | 5 |
|  | *Lichenostomus_melanops* | 1 | 20 | 7 | 3 | 0 | 0 | 9 | 2 |
|  | *Manorina_melanocephala* | 0 | 100 | 18 | 3 | 1 | 1 | 24 | 2 |
|  | *Melithreptus_albogularis* | 0 | 99 | 40 | 0 | 0 | 0 | 39 | 5 |
|  | *Neochmia_temporalis* | 0 | 22 | 0 | 1 | 3 | 1 | 15 | 6 |
|  | *Pardalotus_punctatus* | 0 | 80 | 26 | 7 | 0 | 0 | 0 | 4 |
|  | *Pardalotus_striatus* | 0 | 41 | 5 | 7 | 0 | 0 | 0 | 7 |
|  | *Philemon_citreogularis* | 0 | 38 | 8 | 0 | 0 | 0 | 9 | 2 |
|  | *Philemon_corniculatus* | 3 | 98 | 6 | 0 | 2 | 0 | 55 | 4 |
|  | *Ptilotula_fusca* | 0 | 110 | 40 | 2 | 0 | 0 | 3 | 0 |
|  | *Sericornis_frontalis* | 2 | 41 | 0 | 1 | 3 | 0 | 2 | 3 |
|  | *Smicrornis_brevirostris* | 0 | 70 | 15 | 25 | 0 | 0 | 0 | 28 |
|  | *Strepera_graculina* | 0 | 37 | 0 | 0 | 0 | 0 | 6 | 0 |
| **PROBING** | |  |  |  |  |  |  |  |  |
|  | *Acanthorhynchus_tenuirostris* | 2 | 15 | 2 | 1 | 0 | 0 | 141 | 3 |
|  | *Anthochaera_carunculata* | 2 | 32 | 8 | 0 | 0 | 0 | 63 | 3 |
|  | *Caligavis_chrysops* | 4 | 147 | 62 | 17 | 0 | 0 | 222 | 18 |
|  | *Entomyzon_cyanotis* | 0 | 16 | 0 | 0 | 3 | 0 | 20 | 0 |
|  | *Lichmera_indistincta* | 3 | 1 | 0 | 0 | 0 | 0 | 38 | 5 |
|  | *Meliphaga_lewinii* | 0 | 27 | 10 | 3 | 0 | 0 | 52 | 4 |
|  | *Melithreptus_lunatus* | 0 | 51 | 43 | 1 | 1 | 0 | 85 | 0 |
|  | *Myzomela_obscura* | 0 | 22 | 4 | 0 | 0 | 0 | 47 | 9 |
|  | *Myzomela_sanguinolenta* | 9 | 17 | 9 | 2 | 0 | 0 | 105 | 2 |
|  | *Nesoptilotis_leucotis* | 0 | 16 | 4 | 1 | 0 | 0 | 19 | 3 |
|  | *Phylidonyris_novaehollandiae* | 8 | 14 | 1 | 1 | 0 | 0 | 153 | 0 |
| **SNATCHING** | |  |  |  |  |  |  |  |  |
|  | *Eopsaltria_australis* | 2 | 7 | 0 | 1 | 1 | 8 | 3 | 12 |
|  | *Myiagra_rubecula* | 12 | 5 | 0 | 7 | 0 | 0 | 0 | 21 |
|  | *Pachycephala_pectoralis* | 1 | 12 | 0 | 3 | 0 | 1 | 0 | 42 |
|  | *Pachycephala_rufiventris* | 6 | 33 | 2 | 7 | 0 | 0 | 0 | 105 |
|  | *Petroica_goodenovii* | 3 | 6 | 0 | 3 | 0 | 9 | 0 | 12 |
| **HANG-GLEANING** | |  |  |  |  |  |  |  |  |
|  | *Acanthiza_lineata* | 1 | 17 | 53 | 5 | 0 | 0 | 1 | 20 |
|  | *Melithreptus_brevirostris* | 0 | 14 | 21 | 0 | 0 | 0 | 4 | 0 |
|  | *Ptilotula_penicillata* | 0 | 25 | 27 | 2 | 0 | 0 | 0 | 3 |
|  | *Zosterops_lateralis* | 1 | 49 | 50 | 0 | 0 | 0 | 19 | 4 |
| **FLYCATCHING** | |  |  |  |  |  |  |  |  |
|  | *Rhipidura_albiscapa* | 146 | 13 | 0 | 1 | 0 | 0 | 0 | 51 |

**Table S3** The number of prey attacks in each category of the **foraging substrate** recorded for the 41 species with the minimum of 30 prey attacks.

|  |  | **air** | **bark** | **bud** | **flower** | **fruit** | **ground** | **leaf** | **other** |
| --- | --- | --- | --- | --- | --- | --- | --- | --- | --- |
| **LEAF** | |  |  |  |  |  |  |  |  |
|  | *Acanthiza_lineata* | 1 | 3 | 0 | 1 | 0 | 0 | 91 | 1 |
|  | *Acanthiza_nana* | 0 | 10 | 0 | 0 | 0 | 1 | 225 | 0 |
|  | *Acanthiza_pusilla* | 3 | 113 | 0 | 3 | 2 | 0 | 435 | 1 |
|  | *Acanthiza_reguloides* | 0 | 15 | 0 | 0 | 0 | 5 | 78 | 0 |
|  | *Caligavis_chrysops* | 5 | 14 | 3 | 222 | 0 | 0 | 226 | 0 |
|  | *Dicaeum_hirundinaceum* | 0 | 3 | 0 | 3 | 6 | 0 | 26 | 1 |
|  | *Lichenostomus_melanops* | 1 | 0 | 0 | 9 | 0 | 0 | 32 | 0 |
|  | *Manorina_melanocephala* | 0 | 23 | 0 | 22 | 0 | 4 | 100 | 0 |
|  | *Melithreptus_albogularis* | 0 | 18 | 2 | 34 | 0 | 0 | 126 | 3 |
|  | *Melithreptus_brevirostris* | 0 | 0 | 0 | 4 | 0 | 0 | 35 | 0 |
|  | *Myiagra_rubecula* | 12 | 5 | 0 | 0 | 0 | 5 | 23 | 0 |
|  | *Pachycephala_pectoralis* | 1 | 12 | 0 | 0 | 0 | 0 | 46 | 0 |
|  | *Pachycephala_rufiventris* | 6 | 23 | 0 | 0 | 3 | 0 | 120 | 1 |
|  | *Pardalotus_punctatus* | 0 | 1 | 0 | 0 | 0 | 0 | 116 | 0 |
|  | *Pardalotus_striatus* | 0 | 8 | 0 | 0 | 0 | 0 | 52 | 0 |
|  | *Philemon_citreogularis* | 0 | 5 | 1 | 9 | 0 | 0 | 41 | 1 |
|  | *Ptilotula_fusca* | 0 | 26 | 0 | 3 | 0 | 0 | 126 | 0 |
|  | *Ptilotula_penicillata* | 0 | 1 | 0 | 0 | 0 | 0 | 56 | 0 |
|  | *Smicrornis_brevirostris* | 0 | 6 | 1 | 1 | 0 | 0 | 130 | 0 |
|  | *Strepera_graculina* | 0 | 8 | 0 | 0 | 1 | 0 | 34 | 0 |
|  | *Zosterops_lateralis* | 1 | 2 | 0 | 27 | 6 | 0 | 87 | 0 |
| **FLOWER** | |  |  |  |  |  |  |  |  |
|  | *Acanthorhynchus_tenuirostris* | 2 | 1 | 0 | 141 | 0 | 0 | 20 | 0 |
|  | *Anthochaera_carunculata* | 2 | 0 | 3 | 60 | 15 | 0 | 28 | 0 |
|  | *Entomyzon_cyanotis* | 0 | 8 | 0 | 19 | 0 | 0 | 11 | 1 |
|  | *Lichmera_indistincta* | 3 | 1 | 0 | 40 | 0 | 0 | 3 | 0 |
|  | *Meliphaga_lewinii* | 0 | 4 | 0 | 52 | 1 | 0 | 39 | 0 |
|  | *Melithreptus_lunatus* | 0 | 35 | 2 | 80 | 3 | 0 | 58 | 3 |
|  | *Myzomela_obscura* | 0 | 1 | 4 | 48 | 0 | 0 | 29 | 0 |
|  | *Myzomela_sanguinolenta* | 9 | 0 | 1 | 105 | 0 | 0 | 29 | 0 |
|  | *Nesoptilotis_leucotis* | 0 | 13 | 0 | 18 | 0 | 0 | 12 | 0 |
|  | *Philemon_corniculatus* | 3 | 26 | 0 | 58 | 23 | 2 | 56 | 0 |
|  | *Phylidonyris_novaehollandiae* | 8 | 11 | 0 | 153 | 0 | 0 | 5 | 0 |
| **GROUND** | |  |  |  |  |  |  |  |  |
|  | *Cracticus_tibicen* | 0 | 0 | 0 | 0 | 0 | 33 | 0 | 0 |
|  | *Eopsaltria_australis* | 2 | 10 | 0 | 0 | 0 | 14 | 6 | 2 |
|  | *Neochmia_temporalis* | 0 | 0 | 0 | 0 | 3 | 29 | 7 | 9 |
|  | *Petroica_goodenovii* | 3 | 6 | 0 | 0 | 0 | 12 | 12 | 0 |
|  | *Sericornis_frontalis* | 3 | 11 | 0 | 1 | 0 | 27 | 7 | 3 |
| **BARK** | |  |  |  |  |  |  |  |  |
|  | *Colluricincla_harmonica* | 0 | 20 | 0 | 0 | 0 | 3 | 18 | 0 |
|  | *Cormobates_leucophaea* | 0 | 263 | 0 | 0 | 0 | 1 | 0 | 5 |
|  | *Daphoenositta_chrysoptera* | 0 | 157 | 0 | 0 | 0 | 0 | 0 | 0 |
| **AIR** |  |  |  |  |  |  |  |  |  |
|  | *Rhipidura_albiscapa* | 146 | 17 | 0 | 0 | 0 | 3 | 45 | 0 |

**Table S4** Mean canopy height and the number of foraging records in each category of foraging methods and substrates at each site. Sites are ordered from top to bottom by canopy height (from lowest to highest) as in Figure 1 in the main text and in Table S1.

|  |  | **Methods** | | | | | | | | |  | **Substrates** | | | | | | | | |
| --- | --- | --- | --- | --- | --- | --- | --- | --- | --- | --- | --- | --- | --- | --- | --- | --- | --- | --- | --- | --- |
| **Site** | **Can. height (m)** | **Flycatch** | **Gleaning** | **Hang-gleaning** | **Hover-snatching** | **Manipulation** | **Pouncing** | **Probing** | **Snatching** | **N** |  | **Air** | **Bark** | **Bud** | **Flower** | **Fruit** | **Ground** | **Leaf** | **Other** | **N** |
| White Mountains NP | 10.3 | 0 | 72 | 6 | 0 | 0 | 4 | 13 | 17 | 112 |  | 0 | 4 | 0 | 13 | 0 | 4 | 91 | 0 | 112 |
| Blackwood NP/ Nairana NP | 11 | 1 | 81 | 14 | 6 | 1 | 3 | 31 | 58 | 195 |  | 1 | 14 | 5 | 33 | 3 | 5 | 132 | 2 | 195 |
| Dergholm SP | 12.4 | 12 | 87 | 8 | 2 | 3 | 3 | 176 | 22 | 313 |  | 13 | 81 | 3 | 159 | 3 | 3 | 51 | 0 | 313 |
| Undara Volcanic NP | 13.2 | 4 | 114 | 15 | 1 | 0 | 4 | 78 | 18 | 234 |  | 4 | 17 | 0 | 78 | 1 | 9 | 125 | 0 | 234 |
| Conimbla NP | 13.6 | 21 | 58 | 60 | 9 | 1 | 1 | 28 | 44 | 222 |  | 21 | 18 | 2 | 28 | 0 | 5 | 148 | 0 | 222 |
| Killarney NP/ Bobbiwaa SCA | 13.8 | 17 | 78 | 7 | 1 | 0 | 7 | 13 | 46 | 169 |  | 17 | 8 | 3 | 13 | 0 | 6 | 122 | 0 | 169 |
| Paluma Range NP | 14.9 | 19 | 124 | 30 | 5 | 6 | 1 | 134 | 52 | 371 |  | 19 | 10 | 11 | 142 | 10 | 3 | 175 | 1 | 371 |
| Blair Athol SF | 16.9 | 2 | 70 | 14 | 16 | 1 | 0 | 0 | 11 | 114 |  | 2 | 26 | 0 | 0 | 0 | 2 | 84 | 0 | 114 |
| Bendigo SF | 18.4 | 2 | 90 | 45 | 19 | 0 | 0 | 6 | 12 | 174 |  | 2 | 18 | 0 | 6 | 0 | 7 | 141 | 0 | 174 |
| Chiltern-Mt. Pilot NP | 18.4 | 24 | 271 | 55 | 8 | 2 | 0 | 34 | 10 | 404 |  | 24 | 62 | 0 | 6 | 38 | 62 | 212 | 0 | 404 |
| Pilliga East | 18.7 | 27 | 109 | 13 | 17 | 9 | 3 | 28 | 109 | 315 |  | 27 | 39 | 0 | 29 | 2 | 11 | 207 | 0 | 315 |
| Herberton Range NP | 18.8 | 17 | 184 | 34 | 4 | 4 | 4 | 211 | 64 | 522 |  | 17 | 64 | 14 | 199 | 4 | 17 | 202 | 5 | 522 |
| Grampians NP | 20.4 | 7 | 148 | 28 | 20 | 2 | 0 | 84 | 8 | 297 |  | 8 | 105 | 0 | 51 | 0 | 14 | 119 | 0 | 297 |
| Cobboboonee NP | 20.8 | 8 | 185 | 44 | 31 | 4 | 2 | 31 | 38 | 343 |  | 8 | 120 | 0 | 6 | 1 | 14 | 192 | 2 | 343 |
| Columbey NP/ Wallaroo NP | 21 | 30 | 27 | 27 | 14 | 5 | 1 | 60 | 51 | 215 |  | 30 | 17 | 0 | 60 | 7 | 2 | 99 | 0 | 215 |
| Mt. Binga NP | 21.3 | 7 | 113 | 31 | 25 | 6 | 1 | 86 | 30 | 299 |  | 7 | 48 | 0 | 77 | 3 | 23 | 128 | 13 | 299 |
| Conjola NP | 23.3 | 23 | 50 | 41 | 5 | 5 | 1 | 26 | 115 | 266 |  | 23 | 5 | 0 | 26 | 2 | 9 | 200 | 1 | 266 |
| Croajingolong NP | 25.6 | 9 | 165 | 48 | 19 | 3 | 0 | 211 | 33 | 488 |  | 9 | 108 | 0 | 195 | 2 | 5 | 163 | 6 | 488 |
| Coominglah SF | 26.7 | 13 | 188 | 27 | 27 | 11 | 1 | 17 | 27 | 311 |  | 13 | 101 | 0 | 6 | 3 | 12 | 174 | 2 | 311 |
| Gympie NP | 29.1 | 5 | 121 | 29 | 4 | 0 | 0 | 60 | 21 | 240 |  | 5 | 76 | 0 | 49 | 0 | 8 | 99 | 3 | 240 |
| Bellthorpe NP | 31.5 | 23 | 125 | 32 | 12 | 11 | 1 | 52 | 33 | 289 |  | 23 | 87 | 0 | 45 | 0 | 11 | 123 | 0 | 289 |

**Table S5** The distribution of prey attacks among different categories of methods and substrates in this study and three previous studies from eucalypt woodlands and forests in Australia. **Species mean** is the unweighted mean across species, while the **Proportion** is simple fraction of all prey attacks belonging to a given category (equivalent to the weighted mean across species). Non-passerines and swallows and martins (Hirundinidae) were excluded to allow meaningful comparison with our data. The most commonly used method and substrate is in bold. NA means that category was not used. References are listed in the main text of this article.

|  |  | This study | | Ford et al. 1986 | | Recher et al. 1985 | | Recher and Davis 1998 | |
| --- | --- | --- | --- | --- | --- | --- | --- | --- | --- |
|  |  | Species mean | Proportion | Species mean | Proportion | Species mean | Proportion | Species mean | Proportion |
| Method | |  |  |  |  |  |  |  |  |
|  | Probing | 0.237 | 0.247 | 0.125 | 0.116 | 0.223 | 0.124 | 0.162 | 0.137 |
|  | Gleaning | **0.417** | **0.420** | **0.532** | **0.593** | **0.446** | **0.556** | **0.475** | **0.503** |
|  | Hang-gleaning | 0.112 | 0.115 | NA | NA | 0.010 | 0.028 | NA | NA |
|  | Snatching | 0.132 | 0.120 | 0.157 | 0.147 | 0.143 | 0.110 | 0.078 | 0.076 |
|  | Hover-snatching | 0.038 | 0.043 | 0.017 | 0.013 | 0.011 | 0.016 | 0.051 | 0.073 |
|  | Flycatching | 0.036 | 0.041 | 0.111 | 0.074 | 0.105 | 0.123 | 0.099 | 0.100 |
|  | Pouncing | 0.015 | 0.005 | 0.038 | 0.031 | 0.062 | 0.045 | 0.135 | 0.112 |
|  | Manipulation | 0.013 | 0.010 | 0.021 | 0.027 | NA | NA | NA | NA |
| Substrate | |  |  |  |  |  |  |  |  |
|  | Leaf | **0.504** | **0.513** | **0.514** | **0.534** | 0.277 | **0.379** | 0.218 | 0.246 |
|  | Flower | 0.203 | 0.221 | 0.094 | 0.076 | 0.072 | 0.031 | 0.094 | 0.031 |
|  | Bark | 0.150 | 0.174 | 0.187 | 0.244 | 0.257 | 0.275 | 0.167 | 0.215 |
|  | Ground | 0.078 | 0.028 | 0.074 | 0.067 | **0.287** | 0.190 | **0.413** | **0.402** |
|  | Air | 0.037 | 0.042 | 0.111 | 0.073 | 0.107 | 0.124 | 0.107 | 0.104 |
|  | Bud | 0.003 | 0.003 | NA | NA | NA | NA | NA | NA |
|  | Fruit | 0.015 | 0.012 | 0.021 | 0.007 | NA | NA | NA | NA |
|  | Other | 0.011 | 0.006 | NA | NA | NA | NA | NA | NA |

**Table S6** The number of prey attacks and individuals recorded, mean foraging height, beak length, body mass, and Levins’ index of specialization for the foraging method and substrate in 41 species with the minimum of 30 prey attacks recorded. High values of the Levins’ index indicate narrow niches (specialist) while low values indicate wide niches (generalist species). Beak length and body mass were taken from Higgins et al. (2001-2006) Handbook of Australian, New Zealand, and Antarctic Birds, vols. 5, 6, and 7, Oxford Univ. Press, Melbourne.

| **Species name** | **N prey attacks** | **N individuals** | **Foraging height (m)** | **Beak length (mm)** | **Body mass (g)** | **Levins’ index for method** | **Levins’ index for substrate** |
| --- | --- | --- | --- | --- | --- | --- | --- |
| *Acanthiza lineata* | 97 | 50 | 10.96 | 9.95 | 7.45 | 0.762 | 0.981 |
| *Acanthiza nana* | 236 | 109 | 8.73 | 9.83 | 6.42 | 0.727 | 0.986 |
| *Acanthiza pusilla* | 557 | 263 | 7.54 | 11.41 | 7.06 | 0.727 | 0.923 |
| *Acanthiza reguloides* | 98 | 54 | 6.68 | 11.5 | 7.48 | 0.748 | 0.926 |
| *Acanthorhynchus tenuirostris* | 164 | 62 | 11.34 | 26.54 | 10.64 | 0.952 | 0.953 |
| *Anthochaera carunculata* | 108 | 40 | 13.69 | 32.62 | 111.71 | 0.814 | 0.782 |
| *Caligavis chrysops* | 470 | 193 | 12.33 | 16.2 | 16.15 | 0.724 | 0.829 |
| *Colluricincla harmonica* | 41 | 26 | 8.3 | 26.21 | 67.28 | 0.757 | 0.815 |
| *Cormobates leucophaea* | 269 | 111 | 9.43 | 20.09 | 20.98 | 0.865 | 0.993 |
| *Cracticus tibicen* | 33 | 14 | 0 | 52.8 | 279.46 | 0.840 | 1.000 |
| *Daphoenositta chrysoptera* | 157 | 62 | 15.43 | 14.89 | 12.04 | 0.957 | 1.000 |
| *Dicaeum hirundinaceum* | 39 | 16 | 6.91 | 11.1 | 8.96 | 0.779 | 0.846 |
| *Entomyzon cyanotis* | 39 | 16 | 9.57 | 33.94 | 103.73 | 0.816 | 0.746 |
| *Eopsaltria australis* | 34 | 29 | 4.12 | 15.62 | 19.17 | 0.536 | 0.657 |
| *Lichenostomus melanops* | 42 | 16 | 13.63 | 17.51 | 25.17 | 0.680 | 0.915 |
| *Lichmera indistincta* | 47 | 21 | 8.45 | 18.21 | 10.27 | 0.929 | 0.948 |
| *Manorina melanocephala* | 149 | 58 | 13.71 | 22.9 | 64.7 | 0.852 | 0.855 |
| *Meliphaga lewinii* | 96 | 37 | 12.77 | 22.96 | 31.04 | 0.773 | 0.832 |
| *Melithreptus albogularis* | 183 | 77 | 10.92 | 14.16 | 11.63 | 0.773 | 0.867 |
| *Melithreptus brevirostris* | 39 | 16 | 12.39 | 13.54 | 15.54 | 0.810 | 0.968 |
| *Melithreptus lunatus* | 181 | 65 | 12.87 | 14.37 | 13.79 | 0.742 | 0.718 |
| *Myiagra rubecula* | 45 | 35 | 9.43 | 15.6 | 12.38 | 0.704 | 0.743 |
| *Myzomela obscura* | 82 | 33 | 7.96 | 19.34 | 12.04 | 0.799 | 0.839 |
| *Myzomela sanguinolenta* | 144 | 55 | 14.5 | 14.76 | 7.94 | 0.885 | 0.895 |
| *Neochmia temporalis* | 48 | 18 | 2.56 | 11.01 | 9.26 | 0.707 | 0.807 |
| *Nesoptilotis leucotis* | 43 | 21 | 10.18 | 17.33 | 23.04 | 0.732 | 0.728 |
| *Pachycephala pectoralis* | 59 | 41 | 10.69 | 16.33 | 26.79 | 0.884 | 0.923 |
| *Pachycephala rufiventris* | 153 | 94 | 10.11 | 16.31 | 23.5 | 0.869 | 0.920 |
| *Pardalotus punctatus* | 117 | 44 | 12.28 | 8.39 | 8.27 | 0.869 | 0.998 |
| *Pardalotus striatus* | 60 | 28 | 14.29 | 9.06 | 10.91 | 0.858 | 0.957 |
| *Petroica goodenovii* | 33 | 24 | 3.82 | 12.35 | 8.79 | 0.585 | 0.676 |
| *Philemon citreogularis* | 57 | 24 | 7.68 | 31.16 | 60 | 0.851 | 0.883 |
| *Philemon corniculatus* | 168 | 71 | 10.36 | 35.2 | 97.29 | 0.825 | 0.620 |
| *Phylidonyris novaehollandiae* | 177 | 62 | 12.04 | 22.92 | 19.83 | 0.954 | 0.953 |
| *Ptilotula fusca* | 155 | 56 | 12.89 | 15.68 | 17.12 | 0.893 | 0.936 |
| *Ptilotula penicillata* | 57 | 25 | 10.32 | 15.58 | 17.46 | 0.803 | 0.995 |
| *Rhipidura albiscapa* | 211 | 123 | 8.42 | 11.3 | 7.79 | 0.879 | 0.874 |
| *Sericornis frontalis* | 52 | 30 | 1 | 14.52 | 13 | 0.917 | 0.722 |
| *Smicrornis brevirostris* | 138 | 59 | 8.97 | 7.98 | 5.69 | 0.726 | 0.982 |
| *Strepera graculina* | 43 | 18 | 9.41 | 61.33 | 303.69 | 0.955 | 0.927 |
| *Zosterops lateralis* | 123 | 46 | 8.27 | 12.12 | 12.18 | 0.733 | 0.884 |
